# Supplementary material for: Lectin RCA-I specifically binds to metastasis-associated cell surface glycans in triple-negative breast cancer
Source: Springer Nature journal article supplement (doi:10.1186/s13058-015-0544-9), 2015-03-10

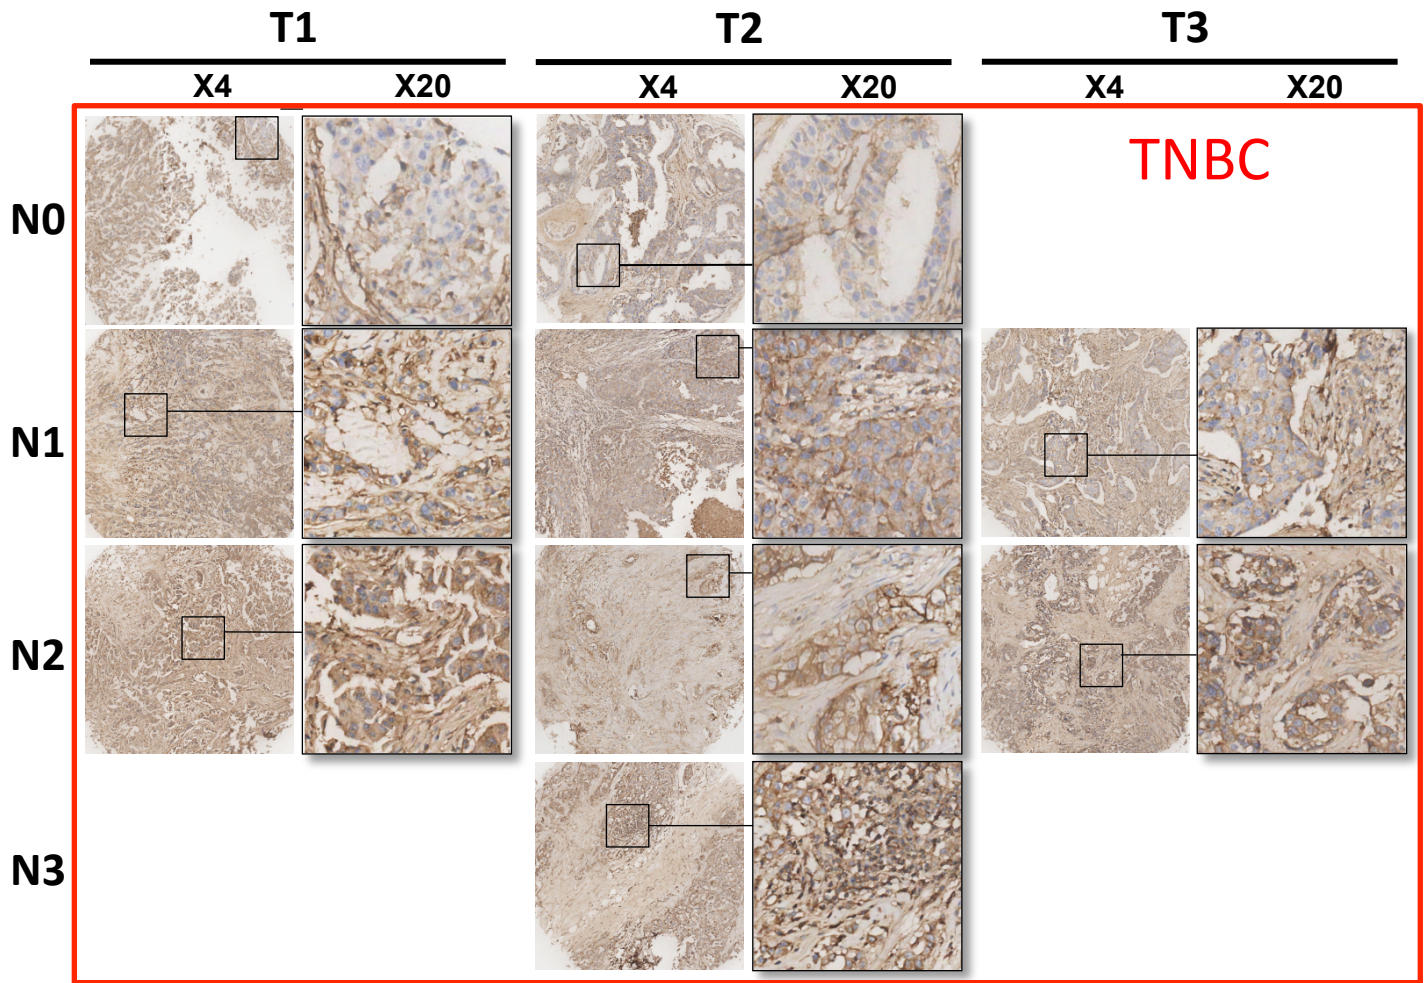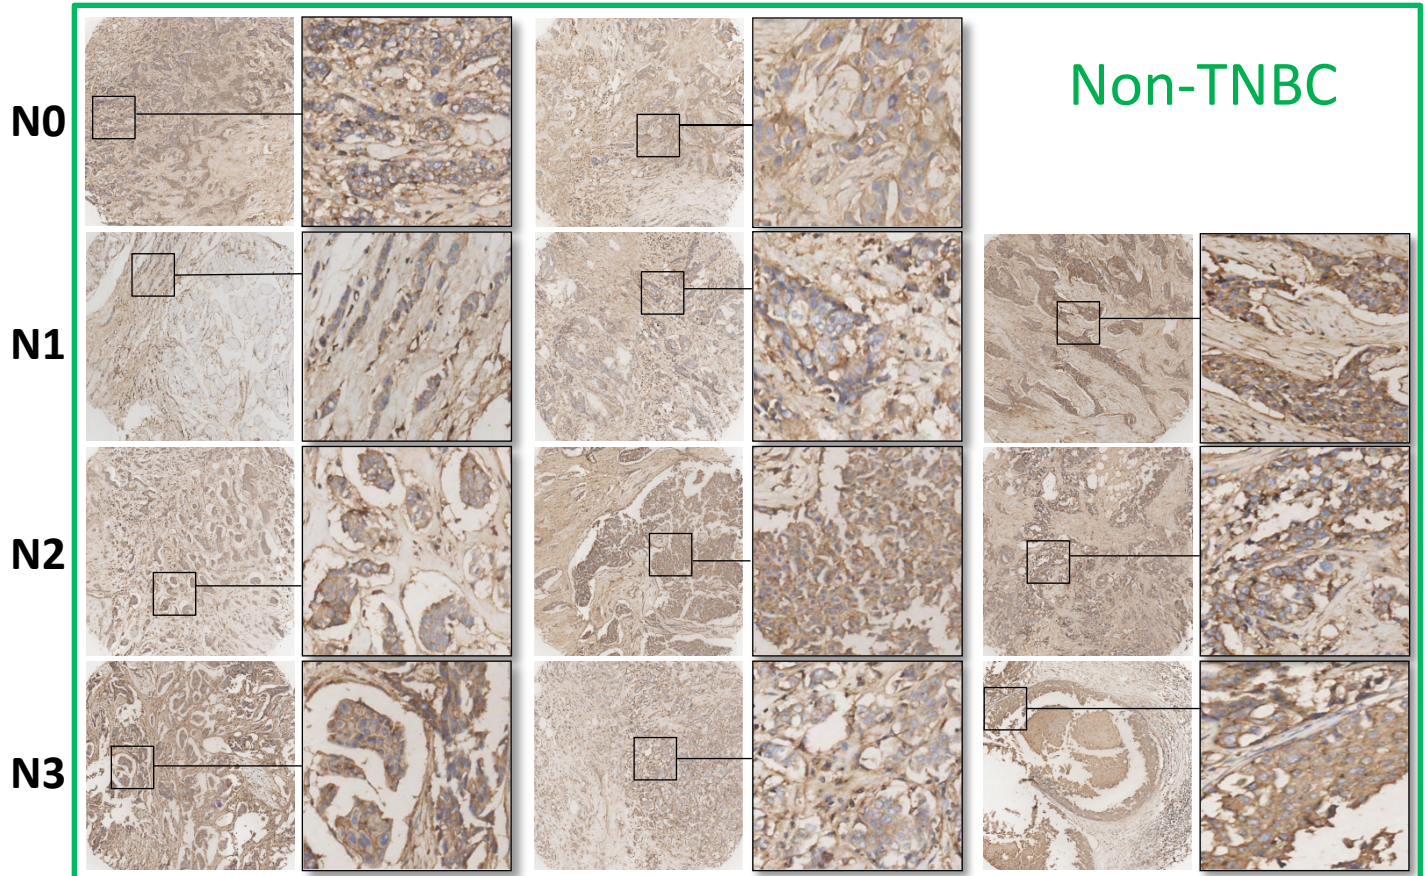

Supplement: MOESM3 [file 9781384]
